# Supplementary material
Source: Elsevier journal article supplement (https://www.sciencedirect.com/science/article/pii/S1885585721003133)
Supplement: mmc1 [file mmc1.pdf]

## **SUPPLEMENTARY DATA**

### **SUPPLEMENTARY METHODS**

#### **The PREDIMED study**

Briefly, from 2003 to 2010, 7447 Spanish participants without cardiovascular disease at baseline but at high cardiovascular (CV) risk were recruited. Participants were women or men aged 55 to 80 years, with type 2 diabetes (T2D) or with at least 3 of the following CV risk factors: body mass index (BMI)  $\geq 25$ , current smoking, hypertension, high levels of low-density lipoprotein (LDL) cholesterol, low levels of high-density lipoprotein (HDL) cholesterol, or a family history of early coronary artery disease. Participants were randomized to 1 of 3 diets: a Mediterranean diet (MedDiet) supplemented with extra virgin olive oil (EVOO), a MedDiet supplemented with mixed nuts, or a control diet (advice to reduce dietary fat). More information is available elsewhere.<sup>1</sup>

#### **Metabolomics analysis**

Amino acids, acylcarnitines (ACs), and other polar plasma metabolites were profiled with the use of liquid chromatography-tandem mass spectrometry on a system comprised of a Shimadzu Nexera 32 U-HPLC (Shimadzu Corp) coupled to a Q Exactive hybrid quadrupole orbitrap mass spectrometer (Thermo Fisher Scientific). Carnitine and ACs were profiled with other polar metabolites in the positive ion mode using high resolution accurate mass detection. Internal standards were added during extraction and monitored to ensure performance, and pooled quality controls were inserted in the queue every 20 samples. Targeted data were processed via MultiQuant software (SCIEX) or TraceFinder (Thermo Scientific) to integrate chromatographic peaks of known identity and data were inspected to

ensure quality signal integration. Identification was conducted by matching measured retention times and masses to a database of > 1200 characterized compounds from the in-house Broad library or exact masses to a database of > 40 000 metabolites found in the Human Metabolome Database v3.14.<sup>2</sup> The reliability of the metabolomic platforms in an epidemiologic research setting has previously been demonstrated.<sup>3</sup> A total of 23 known ACs could be finally identified.

### **Diagnosis criteria for heart failure and atrial fibrillation**

The diagnosis criteria for heart failure (HF) was defined according to the 2005 guidelines of the European Society of Cardiology available at the beginning of the endpoint adjudication in the study.<sup>4</sup> Patients were diagnosed as having symptoms and/or signs of HF (more frequently breathlessness or fatigue at rest or during exertion, or ankle swelling) attributable to an objective evidence of cardiac dysfunction at rest (preferably by echocardiography [ECG]). Atrial fibrillation (AF) was initially identified from an annual review of all outpatient and inpatient medical records of each participant or yearly electrocardiograms (ECGs) performed during follow-up examinations in the health care centers. If AF was mentioned anywhere in the medical record or AF was present in the ECG, all relevant documentation was submitted to the Clinical Endpoint Committee. Even though AF was not a primary endpoint in the trial, the Clinical Endpoint Committee reviewed all medical charts and ECGs from potential AF cases and made a final decision about the presence or absence of AF. A diagnosis of AF was made only if both AF was present in an ECG tracing and an explicit medical diagnosis of AF was made

by a physician. AF events associated with myocardial infarction (MI) or cardiac surgery (usually transient) were not included.

### **Statistical analysis**

Since branched-chain amino acids are related to short-chained ACs, we included them as covariates in additional models using individual ACs as continuous variables (per standard deviation [SD]). For HF, we additionally adjusted for n-terminal pro-brain natriuretic peptide (type B) (NT-proBNP) in a subsample with available values for this biomarker. We used < 900 pg/mL as cutoff value for the 80th percentile of NT-proBNP, considered a threshold risk for cardiovascular (CVD) mortality.<sup>5</sup>

We created weighted metabolite scores combining all ACs, short-chain ACs (C2-C7), medium-chain ACs (C8-C14) and long-chain ACs (C16-C26) with the respective individual coefficients from the fitted multivariable logistic regression models. We applied the leave-one-out cross-validation approach to obtain unbiased estimates of these models and to avoid overfitting when creating the score. Briefly, in each run, logistic regression models were applied to the all-but-one sample (ie, the training data set), and the regression coefficient obtained was the weight applied to the remaining 1 sample (ie, the testing data set) to calculate the score. For each AC score (short-chain, medium-chain, long-chain and total), we adjusted for the same variables as for analysis of individual metabolites. In another model we mutually adjusted for short, medium, and long AC scores.

We assessed the potential effect modification of the intervention (MedDiet groups vs control group), obesity (BMI  $\geq$  25), and type 2 diabetes (T2D). We calculated the product term

between these variables and the AC scores (continuous and quartiles). We used the likelihood ratio test to compare the multivariable models with and without the product term and we obtained the *P* value for multiplicative interaction. We also calculated the relative excess risk due to interaction to estimate additive interaction. We ran joint analyses to observe changes in HF or AF risk according to the combination of AC levels and intervention group, obesity, and T2D status. In addition, we explored the potential effect modification by sex and age group ( $\leq 70$  vs  $> 70$ ) in the association between AC scores (short-chain, medium-chain, long-chain) and HF or AF risk.

We repeated the above analysis with a composite outcome of participants with HF and AF. We ran multinomial logistic regression models for an outcome with 4 possible categories (no disease, only HF, only AF, both HF, and AF). We adjusted for the same previously described covariates and variables used for matching (age, sex, and recruitment center).

Figures were created with the command `coefplot` for Stata and with Python v. 3.7.8.

## REFERENCES

1. Estruch R, Ros E, Salas-Salvadó J, et al. Primary Prevention of Cardiovascular Disease with a Mediterranean Diet Supplemented with Extra-Virgin Olive Oil or Nuts. *N Engl J Med*. 2018;378:e34.
2. Wishart DS, Jewison T, Guo AC, et al. HMDB 3.0—The Human Metabolome Database in 2013. *Nucleic Acids Res*. 2012;41:D801–D807.
3. Townsend MK, Clish CB, Kraft P, et al. Reproducibility of Metabolomic Profiles among Men and Women in 2 Large Cohort Studies. *Clin Chem*. 2013;59:1657–1667.

*Ruiz-Canela et al. Plasma acylcarnitines and risk of incident heart failure and atrial fibrillation: the prevención con dieta mediterránea study*

4. Swedberg K, Cleland J, Dargie H, et al. Grupo de Trabajo de Diagnóstico y Tratamiento de la Insuficiencia Cardíaca Crónica de la Sociedad Europea de Cardiología; Comité de la ESC para la elaboración de las Guías de Práctica Clínica. Guías de Práctica Clínica sobre el Diagnóstico y Tratamiento de la Insuficiencia Cardíaca Crónica. Versión resumida (actualización 2005) [Guidelines for the Diagnosis and Treatment of Chronic Heart Failure: executive summary (update 2005)]. *Rev Esp Cardiol.* 2005;58:1062-1092.
5. Fitó M, Estruch R, Salas-Salvadó J, et al. Effect of the Mediterranean diet on heart failure biomarkers: a randomized sample from the PREDIMED trial. *Eur J Heart Fail.* 2014;16:543-550.

**Table 1 of the supplementary data**

List of carnitines identified in the HILIC-positive method

| Metabolite          | HMDB_ID   | HMDB ID certainty | HMDB name                    | m/z      | RT   |
|---------------------|-----------|-------------------|------------------------------|----------|------|
| carnitine           | HMDB00062 | 1                 | L-Carnitine                  | 162.1127 | 8.82 |
| C2 carnitine        | HMDB00201 | 1                 | L-Acetylcarnitine            | 204.1233 | 8.67 |
| C3 carnitine        | HMDB00824 | 1                 | Propionylcarnitine           | 218.1390 | 8.32 |
| C3-DC-CH3 carnitine | HMDB13133 | 1                 | Methylmalonylcarnitine       | 262.1287 | 8.55 |
| C4 carnitine        | HMDB02013 | 1                 | Butyrylcarnitine             | 232.1546 | 8.00 |
| C4-OH carnitine     | HMDB13127 | 1                 | Hydroxybutyrylcarnitine      | 248.1494 | 8.85 |
| C5 carnitine        | HMDB00688 | 1                 | Isovalerylcarnitine          | 246.1702 | 7.77 |
| C5:1 carnitine      | HMDB02366 | 1                 | Tiglylcarnitine              | 244.1546 | 7.86 |
| C5-DC carnitine     | HMDB13130 | 1                 | Glutarylcarnitine            | 276.1443 | 8.31 |
| C6 carnitine        | HMDB00705 | 1                 | Hexanoylcarnitine            | 260.1858 | 7.52 |
| C7 carnitine        | HMDB13238 | 1                 | Heptanoylcarnitine           | 274.2013 | 7.41 |
| C8 carnitine        | HMDB00791 | 1                 | L-Octanoylcarnitine          | 288.2171 | 7.30 |
| C9 carnitine        | HMDB13288 | 1                 | Nonanoylcarnitine            | 302.2325 | 7.16 |
| C10 carnitine       | HMDB00651 | 1                 | Decanoylcarnitine            | 316.2481 | 7.10 |
| C12 carnitine       | HMDB02250 | 1                 | Dodecanoylcarnitine          | 344.2794 | 6.92 |
| C12:1 carnitine     | HMDB13326 | 2                 | trans-2-Dodecenoylcarnitine  | 342.2638 | 6.94 |
| C14 carnitine       | HMDB05066 | 1                 | Tetradecanoylcarnitine       | 372.3110 | 6.78 |
| C14:1 carnitine     | HMDB02014 | 2                 | cis-5-Tetradecenoylcarnitine | 370.2952 | 6.77 |
| C14:2 carnitine     | HMDB13331 | 2                 | 3, 5-Tetradecadiencarnitine  | 368.2795 | 6.84 |
| C16 carnitine       | HMDB00222 | 1                 | L-Palmitoylcarnitine         | 400.3420 | 6.66 |
| C18 carnitine       | HMDB00848 | 1                 | Stearoylcarnitine            | 428.3733 | 6.55 |
| C18:1 carnitine     | HMDB05065 | 2                 | Oleoylcarnitine              | 426.3578 | 6.57 |
| C18:2 carnitine     | HMDB06469 | 2                 | Linoleylcarnitine            | 424.3421 | 6.63 |
| C26 carnitine       | HMDB06347 | 1                 | Hexacosanoylcarnitine        | 540.5002 | 6.24 |

HILIC, hydrophilic interaction liquid chromatography; HMDB, Human Metabolome Database.

\*1 = compound identified in our analysis at the Broad Institute and matched in HMDB; 2 = representative ID.

**Table 2 of the supplementary data**

$\beta$  coefficients\* (95% confidence interval) of acylcarnitine scores (SD) and cardiovascular risk factors (SD)

|                   | No.  | Short-chain AC             | Medium-chain AC            | Long-chain AC                 |
|-------------------|------|----------------------------|----------------------------|-------------------------------|
| DBP               | 1450 | 0.04 (-0.01 to 0.09)       | <b>0.05 (0.01 to 0.09)</b> | 0.02 (-0.02 to 0.07)          |
| SBP               | 1450 | 0.01 (-0.05 to 0.06)       | -0.01 (-0.08 to 0.06)      | <b>-0.06 (-0.10 to -0.01)</b> |
| Total cholesterol | 1237 | -0.03 (-0.08 to 0.02)      | 0.02 (-0.04 to 0.08)       | -0.04 (-0.09 to 0.01)         |
| Fasting glucose   | 1235 | <b>0.10 (0.01 to 0.18)</b> | 0.09 (-0.01 to 0.19)       | 0.01 (-0.12 to 0.14)          |
| TG                | 1228 | 0.05 (-0.01 to 0.10)       | <b>0.12 (0.08 to 0.16)</b> | -0.03 (-0.08 to 0.02)         |
| HDL-cholesterol   | 1222 | 0.00 (-0.06 to 0.06)       | -0.04 (-0.12 to 0.05)      | -0.05 (-0.13 to 0.03)         |
| LDL-cholesterol   | 1146 | -0.06 (0.14 to 0.02)       | -0.01 (-0.05 to 0.03)      | -0.03 (-0.10 to 0.03)         |

DBP, diastolic blood pressure; SBP, systolic blood pressure; TG, triglycerides; HDL, high-density lipoprotein; LDL, low density lipoprotein.

\*Adjusted for sex, age, intervention group (MedDiet + EVOO or MedDiet + nuts), body mass index (kg/m<sup>2</sup>), smoking (never, current, former), leisure-time physical activity (metabolic equivalent tasks in minutes/d), prevalent chronic diseases (dyslipidemia, hypertension, and type 2 diabetes), and medication use (angiotensin converting-enzyme inhibitors, diuretics, other antihypertensive treatments, statins and other lipid-lowering agents, insulin, oral hypoglycemic agents, and antiplatelet therapy).

Table 3 of supplementary data

Association between baseline levels of individual acylcarnitines and incident HF in a nested case-control study<sup>a</sup> of the PREDIMED trial

|                            | Crude OR per 1 SD increment <sup>b</sup> (95%CI) | FDR-corrected P value <sup>c</sup> | Crude OR (95%CI) |                  |                  |                  |
|----------------------------|--------------------------------------------------|------------------------------------|------------------|------------------|------------------|------------------|
|                            |                                                  |                                    | Quartile 1       | Quartile 2       | Quartile 3       | Quartile 4       |
| <b>C2 carnitine</b>        | 1.18 (1.01-1.37)                                 | .109                               | 1.00 (ref)       | 1.16 (0.76-1.79) | 1.22 (0.78-1.90) | 1.51 (.99-2.32)  |
| <b>C3 carnitine</b>        | 0.97 (0.84-1.13)                                 | .804                               | 1.00 (ref)       | 1.31 (0.88-1.95) | 1.23 (0.81-1.89) | 0.99 (0.65-1.52) |
| <b>C3-DC-CH3 carnitine</b> | 1.13 (0.97-1.32)                                 | .228                               | 1.00 (ref)       | 0.85 (0.56-1.30) | 1.29 (0.86-1.95) | 1.14 (0.75-1.74) |
| <b>C4 carnitine</b>        | 1.06 (0.91-1.24)                                 | .624                               | 1.00 (ref)       | 1.77 (1.16-2.71) | 1.54 (1.00-2.36) | 1.13 (0.72-1.77) |
| <b>C4-OH carnitine</b>     | 1.29 (1.11-1.51)                                 | .022                               | 1.00 (ref)       | 0.77 (0.50-1.19) | 1.26 (0.82-1.94) | 1.58 (1.05-2.40) |
| <b>C5 carnitine</b>        | 1.03 (0.88-1.20)                                 | .804                               | 1.00 (ref)       | 0.93 (0.61-1.41) | 1.28 (0.86-1.91) | 1.20 (0.77-1.88) |
| <b>C5:1 carnitine</b>      | 1.14 (0.99-1.31)                                 | .189                               | 1.00 (ref)       | 0.97 (0.63-1.48) | 1.38 (0.91-2.11) | 1.40 (0.92-2.11) |
| <b>C5-DC carnitine</b>     | 0.98 (0.85-1.12)                                 | .804                               | 1.00 (ref)       | 1.01 (0.68-1.49) | 1.00 (0.67-1.49) | 0.85 (0.57-1.28) |
| <b>C6 carnitine</b>        | 1.13 (0.97-1.32)                                 | .228                               | 1.00 (ref)       | 0.96 (0.63-1.47) | 1.24 (0.82-1.88) | 1.34 (0.88-2.04) |
| <b>C7 carnitine</b>        | 1.23 (1.05-1.44)                                 | .051                               | 1.00 (ref)       | 1.29 (0.84-2.00) | 1.65 (1.06-2.56) | 1.75 (1.12-2.72) |
| <b>C8 carnitine</b>        | 1.00 (0.85-1.16)                                 | .954                               | 1.00 (ref)       | 1.08 (0.73-1.60) | 1.44 (0.95-2.18) | 1.01 (0.65-1.56) |
| <b>C9 carnitine</b>        | 0.98 (0.85-1.13)                                 | .804                               | 1.00 (ref)       | 0.73 (0.49-1.10) | 0.96 (0.64-1.45) | 0.92 (0.62-1.37) |
| <b>C10 carnitine</b>       | 0.94 (0.81-1.10)                                 | .624                               | 1.00 (ref)       | 1.00 (0.67-1.47) | 1.31 (0.87-1.96) | 0.88 (0.57-1.36) |
| <b>C12 carnitine</b>       | 1.06 (0.91-1.23)                                 | .624                               | 1.00 (ref)       | 0.94 (0.63-1.41) | 1.19 (0.80-1.77) | 1.05 (0.68-1.60) |
| <b>C12:1 carnitine</b>     | 1.07 (0.92-1.25)                                 | .624                               | 1.00 (ref)       | 1.31 (0.87-1.97) | 1.18 (0.77-1.81) | 1.40 (0.89-2.20) |
| <b>C14 carnitine</b>       | 1.24 (1.06-1.44)                                 | .043                               | 1.00 (ref)       | 0.87 (0.56-1.34) | 1.32 (0.87-2.01) | 1.65 (1.09-2.50) |



Ruiz-Canela et al. Plasma acylcarnitines and risk of incident heart failure and atrial fibrillation: the prevención con dieta mediterránea study

|                            |                                                           |                                          |                                       |                   |                   |                   |
|----------------------------|-----------------------------------------------------------|------------------------------------------|---------------------------------------|-------------------|-------------------|-------------------|
| <b>C14:1 carnitine</b>     | 1.06 (0.91-1.24)                                          | .624                                     | 1.00 (ref)                            | 1.16 (0.79-1.72)  | 0.99 (0.65-1.51)  | 1.18 (0.77-1.81)  |
| <b>C14:2 carnitine</b>     | 1.17 (1.00-1.37)                                          | .135                                     | 1.00 (ref)                            | 1.26 (0.83-1.92)  | 1.37 (0.90-2.08)  | 1.71 (1.10-2.64)  |
| <b>C16 carnitine</b>       | 1.27 (1.09-1.48)                                          | .023                                     | 1.00 (ref)                            | 1.44 (0.94-2.20)  | 1.57 (1.02-2.41)  | 1.87 (1.21-2.89)  |
| <b>C18 carnitine</b>       | 1.20 (1.04-1.39)                                          | .059                                     | 1.00 (ref)                            | 1.52 (0.99-2.32)  | 1.43 (0.92-2.21)  | 1.71 (1.11-2.62)  |
| <b>C18:1 carnitine</b>     | 1.10 (0.95-1.29)                                          | .109                                     | 1.00 (ref)                            | 1.22 (0.81-1.84)  | 0.98 (0.64-1.49)  | 1.22 (0.79-1.89)  |
| <b>C18:2 carnitine</b>     | 1.19 (1.02-1.39)                                          | .804                                     | 1.00 (ref)                            | 1.41 (0.92-2.15)  | 1.20 (0.77-1.89)  | 1.85 (1.20-2.85)  |
| <b>C26 carnitine</b>       | 1.14 (0.99-1.32)                                          | .228                                     | 1.00 (ref)                            | 1.11 (0.73-1.68)  | 1.35 (0.89-2.03)  | 1.36 (0.91-2.05)  |
|                            | <b>Adjusted OR per 1 SD increment<sup>b</sup> (95%CI)</b> | <b>FDR-corrected P value<sup>c</sup></b> | <b>Multivariable model OR (95%CI)</b> |                   |                   |                   |
|                            |                                                           |                                          | <i>Quartile 1</i>                     | <i>Quartile 2</i> | <i>Quartile 3</i> | <i>Quartile 4</i> |
| <b>C2 carnitine</b>        | 1.20 (1.02-1.42)                                          | .085                                     | 1.00 (ref)                            | 1.20 (0.75-1.90)  | 1.15 (0.72-1.84)  | 1.67 (1.05-2.65)  |
| <b>C3 carnitine</b>        | 0.91 (0.77-1.08)                                          | .397                                     | 1.00 (ref)                            | 1.20 (0.78-1.85)  | 1.20 (0.75-1.90)  | 0.87 (0.55-1.38)  |
| <b>C3-DC-CH3 carnitine</b> | 1.08 (0.91-1.27)                                          | .485                                     | 1.00 (ref)                            | 0.88 (0.56-1.39)  | 1.26 (0.82-1.95)  | 1.04 (0.66-1.64)  |
| <b>C4 carnitine</b>        | 1.03 (0.87-1.23)                                          | .790                                     | 1.00 (ref)                            | 1.85 (1.17-2.93)  | 1.39 (0.88-2.20)  | 1.23 (0.75-2.01)  |
| <b>C4-OH carnitine</b>     | 1.21 (1.02-1.45)                                          | .085                                     | 1.00 (ref)                            | 0.63 (0.39-1.02)  | 1.06 (0.66-1.70)  | 1.31 (0.83-2.07)  |
| <b>C5 carnitine</b>        | 0.88 (0.74-1.06)                                          | .336                                     | 1.00 (ref)                            | 0.81 (0.51-1.28)  | 1.13 (0.73-1.74)  | 0.87 (0.54-1.42)  |
| <b>C5:1 carnitine</b>      | 1.11 (0.94-1.30)                                          | .351                                     | 1.00 (ref)                            | 1.01 (0.64-1.61)  | 1.50 (0.95-2.36)  | 1.46 (0.93-2.28)  |
| <b>C5-DC carnitine</b>     | 0.98 (0.84-1.14)                                          | .820                                     | 1.00 (ref)                            | 1.09 (0.72-1.66)  | 1.05 (0.68-1.61)  | 0.86 (0.56-1.33)  |
| <b>C6 carnitine</b>        | 1.14 (0.96-1.35)                                          | .276                                     | 1.00 (ref)                            | 1.07 (0.68-1.70)  | 1.27 (0.81-2.00)  | 1.50 (0.95-2.37)  |
| <b>C7 carnitine</b>        | 1.22 (1.03-1.45)                                          | .075                                     | 1.00 (ref)                            | 1.57 (0.97-2.52)  | 1.97 (1.22-3.19)  | 1.77 (1.10-2.85)  |
| <b>C8 carnitine</b>        | 1.03 (0.87-1.22)                                          | .790                                     | 1.00 (ref)                            | 1.24 (0.81-1.91)  | 1.67 (1.05-2.64)  | 1.20 (0.75-1.94)  |
| <b>C9 carnitine</b>        | 0.95 (0.81-1.11)                                          | .592                                     | 1.00 (ref)                            | 0.75 (0.49-1.15)  | 1.06 (0.68-1.64)  | 0.87 (0.57-1.34)  |

*Ruiz-Canela et al. Plasma acylcarnitines and risk of incident heart failure and atrial fibrillation: the prevención con dieta mediterránea study*

|                        |                  |      |            |                  |                  |                  |
|------------------------|------------------|------|------------|------------------|------------------|------------------|
| <b>C10 carnitine</b>   | 0.99 (0.83-1.17) | .887 | 1.00 (ref) | 1.19 (0.77-1.83) | 1.48 (0.95-2.31) | 1.07 (0.66-1.72) |
| <b>C12 carnitine</b>   | 1.10 (0.93-1.30) | .351 | 1.00 (ref) | 0.97 (0.63-1.50) | 1.26 (0.82-1.93) | 1.24 (0.78-1.96) |
| <b>C12:1 carnitine</b> | 1.11 (0.93-1.31) | .351 | 1.00 (ref) | 1.45 (0.93-2.25) | 1.21 (0.76-1.93) | 1.64 (1.00-2.69) |
| <b>C14 carnitine</b>   | 1.22 (1.04-1.44) | .057 | 1.00 (ref) | 0.89 (0.56-1.42) | 1.37 (0.87-2.14) | 1.66 (1.07-2.59) |
| <b>C14:1 carnitine</b> | 1.12 (0.95-1.33) | .336 | 1.00 (ref) | 1.25 (0.82-1.92) | 0.95 (0.60-1.50) | 1.41 (0.89-2.25) |
| <b>C14:2 carnitine</b> | 1.25 (1.05-1.48) | .053 | 1.00 (ref) | 1.51 (0.95-2.40) | 1.68 (1.06-2.66) | 1.96 (1.23-3.15) |
| <b>C16 carnitine</b>   | 1.31 (1.11-1.55) | .017 | 1.00 (ref) | 1.39 (0.88-2.20) | 1.49 (0.93-2.39) | 1.95 (1.23-3.11) |
| <b>C18 carnitine</b>   | 1.36 (1.15-1.61) | .006 | 1.00 (ref) | 1.48 (0.93-2.35) | 1.51 (0.94-2.41) | 2.03 (1.28-3.23) |
| <b>C18:1 carnitine</b> | 1.20 (1.01-1.42) | .088 | 1.00 (ref) | 1.17 (0.75-1.82) | 0.97 (0.61-1.52) | 1.43 (0.89-2.29) |
| <b>C18:2 carnitine</b> | 1.28 (1.08-1.53) | .038 | 1.00 (ref) | 1.46 (0.92-2.30) | 1.24 (0.76-2.03) | 2.14 (1.34-3.42) |
| <b>C26 carnitine</b>   | 1.23 (1.05-1.45) | .053 | 1.00 (ref) | 1.12 (0.72-1.76) | 1.47 (0.93-2.31) | 1.55 (1.00-2.40) |

<sup>a</sup> Cases and controls matched by sex, age, and recruitment center.

<sup>b</sup> Values were normalized and scaled to multiples of 1 SD using the rank-based inverse normal transformation.

<sup>c</sup> False discovery rate-corrected *P* value (Simes's method).

<sup>d</sup> Adjusted for intervention group (MedDiet + EVOO or MedDiet + nuts), body mass index (kg/m<sup>2</sup>), smoking (never current former), leisure-time physical activity (metabolic equivalent tasks in minutes/d), prevalent chronic diseases (dyslipidemia, hypertension, and diabetes), and medication use (angiotensin-converting enzyme inhibitors, diuretics, other antihypertensive treatments, statins and other lipid-lowering agents, insulin, oral hypoglycemic agents, and antiplatelet therapy).

**Table 4 of the supplementary data**

Association between naseline combined scores of plasma acylcarnitine levels and incident HF or AF in nested case-control studies<sup>a</sup> of the PREDIMED trial

|                                        | Multivariable <sup>b</sup> adjusted OR (95%CI) |                  |                   |                  |                         |                                 |                  |
|----------------------------------------|------------------------------------------------|------------------|-------------------|------------------|-------------------------|---------------------------------|------------------|
|                                        | Quartile 1                                     | Quartile 2       | Quartile 3        | Quartile 4       | P for trend (quartiles) | per 1 SD increment <sup>c</sup> | P value (per SD) |
| <b>Heart failure<sup>1</sup></b>       |                                                |                  |                   |                  |                         |                                 |                  |
| Short-chain-AC                         | 1.00 (ref)                                     | 1.10 (0.67-1.80) | 1.54 (0.96-2.47)  | 1.60 (1.00-2.57) | .024                    | 1.15 (0.98-1.37)                | .087             |
| Medium-chain-AC                        | 1.00 (ref)                                     | 1.34 (0.82-2.21) | 0.99 (0.60-1.63)  | 1.87 (1.19-2.96) | .011                    | 1.28 (1.09-1.51)                | .003             |
| Long-chain-AC                          | 1.00 (ref)                                     | 1.45 (0.90-2.34) | 1.72 (1.09-2.470) | 1.66 (1.07-2.60) | .022                    | 1.21 (1.04-1.42)                | .014             |
| <b>Total AC</b>                        | 1.00 (ref)                                     | 1.32 (0.78-2.21) | 1.42 (0.87-2.30)  | 2.08 (1.28-3.40) | .002                    | 1.34 (1.14-1.58)                | < .001           |
| <b>Atrial fibrillation<sup>1</sup></b> |                                                |                  |                   |                  |                         |                                 |                  |
| Short-chain-AC                         | 1.00 (ref)                                     | 1.05 (0.75-1.47) | 1.03 (0.73-1.46)  | 1.15 (0.82-1.62) | .441                    | 1.06 (0.94-1.20)                | .362             |
| Medium-chain-AC                        | 1.00 (ref)                                     | 1.21 (0.84-1.75) | 1.08 (0.76-1.55)  | 1.42 (1.01-1.99) | .063                    | 1.10 (0.97-1.24)                | .133             |
| Long-chain-AC                          | 1.00 (ref)                                     | 0.97 (0.66-1.42) | 1.41 (0.99-2.00)  | 1.70 (1.20-2.42) | .001                    | 1.20 (1.06-1.36)                | .005             |
| <b>Total AC</b>                        | 1.00 (ref)                                     | 1.29 (0.91-1.84) | 1.17 (0.82-1.68)  | 1.46 (1.04-2.05) | .051                    | 1.14 (1.01-1.29)                | .035             |
| <b>HF or/and AF</b>                    |                                                |                  |                   |                  |                         |                                 |                  |
| Short-chain-AC                         | 1.00 (ref)                                     | 0.91 (0.65-1.27) | 1.18 (0.88-1.59)  | 1.37 (1.02-1.84) | .461                    | 1.11 (1.00-1.22)                | .046             |

|                        |            |                  |                  |                  |      |                  |        |
|------------------------|------------|------------------|------------------|------------------|------|------------------|--------|
| <b>Medium-chain-AC</b> | 1.00 (ref) | 1.00 (0.75-1.35) | 1.03 (0.69-1.55) | 1.37 (1.15-1.63) | .210 | 1.17 (1.07-1.28) | < .001 |
| <b>Long-chain-AC</b>   | 1.00 (ref) | 0.96 (0.63-1.48) | 1.34 (1.16-1.54) | 1.74 (1.32-2.29) | .016 | 1.24 (1.10-1.40) | < .001 |
| <b>Total AC</b>        | 1.00 (ref) | 1.16 (0.94-1.43) | 1.20 (0.93-1.57) | 1.63 (1.26-2.11) | .050 | 1.25 (1.13-1.40) | < .001 |

AC, acylcarnitine; AF, atrial fibrillation; HF, heart failure.

<sup>a</sup> Cases and controls matched by sex, age, and recruitment center.

<sup>b</sup> Adjusted for intervention group (MedDiet+EVOO. MedDiet+nuts), body mass index (kg/m<sup>2</sup>), smoking (never, current, former), leisure-time physical activity (metabolic equivalent tasks in minutes/d), prevalent chronic diseases (dyslipidemia, hypertension, and diabetes), and medication use (angiotensin converting-enzyme inhibitors, diuretics, other antihypertensive treatments, statins and other lipid-lowering agents, insulin, oral hypoglycemic agents, and antiplatelet therapy), and additionally for age, sex, and recruitment center for the total outcome HF + AF.

<sup>c</sup> Values were normalized and scaled to multiples of 1 SD using the rank-based inverse normal transformation and a weighted sum of ACs was then calculated.

**Table 5 of the supplementary data**

Association between baseline combined scores of plasma acylcarnitine levels and incident heart failure or AF stratified by sex and age group in nested case-control studies<sup>a</sup> of the PREDIMED trial

|                                        | Multivariable <sup>b</sup> adjusted OR (95%CI) |                  |                          |                  |                  |                          |
|----------------------------------------|------------------------------------------------|------------------|--------------------------|------------------|------------------|--------------------------|
|                                        | Sex                                            |                  |                          | Age group        |                  |                          |
|                                        | Men                                            | Women            | <i>P</i> for interaction | ≤70 y            | > 70 y           | <i>P</i> for interaction |
| <b>Heart failure<sup>a</sup></b>       |                                                |                  |                          |                  |                  |                          |
| <b>Short-chain-AC</b>                  | 1.01 (0.78-1.31)                               | 1.27 (1.03-1.59) | .083                     | 1.09 (0.86-1.38) | 1.22 (0.97-1.54) | .538                     |
| <b>Medium-chain-AC</b>                 | 1.39 (1.07-1.81)                               | 1.40 (1.11-1.76) | .995                     | 1.47 (1.14-1.91) | 1.39 (1.01-1.75) | .798                     |
| <b>Long-chain-AC</b>                   | 1.13 (0.88-1.45)                               | 1.29 (1.04-1.61) | .586                     | 1.13-(0.88-1.44) | 1.32 (1.06-1.66) | .340                     |
| <b>Atrial fibrillation<sup>*</sup></b> |                                                |                  |                          |                  |                  |                          |
| <b>Short-chain-AC</b>                  | 1.06 (0.89-1.26)                               | 1.08 (0.90-1.31) | .967                     | 0.97 (0.83-1.14) | 1.24 (0.99-1.55) | .102                     |
| <b>Medium-chain-AC</b>                 | 1.20 (0.99-1.43)                               | 1.15 (0.95-1.38) | .569                     | 1.11 (0.94-1.30) | 1.28 (1.03-1.60) | .295                     |
| <b>Long-chain-AC</b>                   | 1.15 (0.95-1.39)                               | 1.32 (1.09-1.59) | .377                     | 1.19 (1.00-1.41) | 1.27 (1.02-1.58) | .582                     |

95%CI, 95% confidence interval; AC, acylcarnitine.

<sup>\*</sup> Cases and controls matched by sex, age, and recruitment center.

Ruiz-Canela et al. Plasma acylcarnitines and risk of incident heart failure and atrial fibrillation: the prevención con dieta mediterránea study

Table 6 of the supplementary dat

Association between baseline levels of individual acylcarnitines and incident AF in a nested case-control study<sup>a</sup> of the PREDIMED trial

|                            | Crude OR per 1 SD increment <sup>b</sup> (95%CI) | FDR-corrected P value <sup>c</sup> | Crude OR (95%CI) |                  |                  |                   |
|----------------------------|--------------------------------------------------|------------------------------------|------------------|------------------|------------------|-------------------|
|                            |                                                  |                                    | Quartile 1       | Quartile 2       | Quartile 3       | Quartile 4        |
| <b>C2 carnitine</b>        | 1.16 (1.03-1.30)                                 | .036                               | 1.00 (ref)       | 1.07 (0.77-1.51) | 1.47 (1.05-2.06) | 1.39 (1.00-1.94)  |
| <b>C3 carnitine</b>        | 1.08 (0.96-1.21)                                 | .273                               | 1.00 (ref)       | 1.17 (0.84-1.62) | 1.1 (.78-1.53)   | 1.52 (1.09-2.12)  |
| <b>C3-DC-CH3 carnitine</b> | 1.07 (0.95-1.21)                                 | .374                               | 1.00 (ref)       | 0.95 (0.69-1.32) | 1.16 (0.83-1.61) | 1.12 (0.80-1.57)  |
| <b>C4 carnitine</b>        | 1.00 (0.89-1.12)                                 | .992                               | 1.00 (ref)       | 1.15 (0.83-1.60) | 1.23 (0.89-1.69) | 0.90 (0.64-1.27)  |
| <b>C4-OH carnitine</b>     | 1.09 (0.97-1.23)                                 | .254                               | 1.00 (ref)       | 0.92 (0.66-1.28) | 0.96 (0.68-1.35) | 1.23 (0.89-1.70)  |
| <b>C5 carnitine</b>        | 1.02 (0.91-1.16)                                 | .800                               | 1.00 (ref)       | 1.09 (0.78-1.52) | 1.08 (0.77-1.53) | 1.00 (0.700-1.42) |
| <b>C5:1 carnitine</b>      | 1.07 (0.95-1.21)                                 | .313                               | 1.00 (ref)       | 0.97 (0.69-1.35) | 0.78 (0.56-1.10) | 1.25 (0.91-1.71)  |
| <b>C5-DC carnitine</b>     | 1.00 (0.89-1.13)                                 | .992                               | 1.00 (ref)       | 1.01 (0.72-1.40) | 0.84 (0.60-1.17) | 0.98 (0.70-1.36)  |
| <b>C6 carnitine</b>        | 1.17 (1.05-1.32)                                 | .027                               | 1.00 (ref)       | 1.02 (0.73-1.43) | 1.08 (0.77-1.49) | 1.42 (1.03-1.95)  |
| <b>C7 carnitine</b>        | 1.11 (0.99-1.25)                                 | .158                               | 1.00 (ref)       | 1.15 (0.82-1.60) | 1.10 (0.78-1.55) | 1.35 (0.97-1.88)  |
| <b>C8 carnitine</b>        | 1.10 (0.98-1.23)                                 | .196                               | 1.00 (ref)       | 1.14 (0.82-1.59) | 1.29 (0.92-1.82) | 1.22 (0.87-1.70)  |
| <b>C9 carnitine</b>        | 1.00 (0.89-1.12)                                 | .992                               | 1.00 (ref)       | 0.98 (0.70-1.39) | 1.03 (0.73-1.44) | 0.99 (0.71-1.38)  |
| <b>C10 carnitine</b>       | 1.10 (0.98-1.23)                                 | .194                               | 1.00 (ref)       | 0.90 (0.65-1.24) | 1.13 (0.82-1.57) | 1.21 (0.88-1.66)  |
| <b>C12 carnitine</b>       | 1.14 (1.02-1.29)                                 | .058                               | 1.00 (ref)       | 1.08 (0.76-1.53) | 1.10 (0.78-1.56) | 1.44 (1.04-1.99)  |
| <b>C12:1 carnitine</b>     | 1.19 (1.06-1.34)                                 | .016                               | 1.00 (ref)       | 1.08 (0.76-1.54) | 1.34 (0.95-1.89) | 1.53 (1.10-2.13)  |
| <b>C14 carnitine</b>       | 1.19 (1.06-1.34)                                 | .015                               | 1.00 (ref)       | 1.25 (0.89-1.76) | 1.32 (0.92-1.91) | 1.66 (1.20-2.31)  |
| <b>C14:1 carnitine</b>     | 1.12 (1.00-1.26)                                 | .108                               | 1.00 (ref)       | 0.97 (0.70-1.34) | 1.05 (0.75-1.47) | 1.40 (1.02-1.92)  |
| <b>C14:2 carnitine</b>     | 1.16 (1.03-1.30)                                 | .044                               | 1.00 (ref)       | 1.16 (0.82-1.63) | 1.20 (0.85-1.70) | 1.60 (1.15-2.24)  |

*Ruiz-Canela et al. Plasma acylcarnitines and risk of incident heart failure and atrial fibrillation: the prevención con dieta mediterránea study*

|                            |                                                          |                                         |                                                      |                   |                   |                   |
|----------------------------|----------------------------------------------------------|-----------------------------------------|------------------------------------------------------|-------------------|-------------------|-------------------|
| <b>C16 carnitine</b>       | 1.26 (1.12-1.43)                                         | .005                                    | 1.00 (ref)                                           | 1.14 (0.80-1.62)  | 1.46 (1.04-2.06)  | 1.83 (1.30-2.57)  |
| <b>C18 carnitine</b>       | 1.23 (1.09-1.38)                                         | .010                                    | 1.00 (ref)                                           | 1.07 (0.75-1.53)  | 1.29 (0.91-1.82)  | 1.71 (1.22-2.40)  |
| <b>C18:1 carnitine</b>     | 1.17 (1.04-1.32)                                         | .036                                    | 1.00 (ref)                                           | 1.05 (0.75-1.47)  | 0.81 (0.56-1.17)  | 1.50 (1.08-2.09)  |
| <b>C18:2 carnitine</b>     | 1.21 (1.07-1.37)                                         | .015                                    | 1.00 (ref)                                           | 1.22 (0.87-1.71)  | 1.39 (0.98-1.97)  | 1.74 (1.23-2.46)  |
| <b>C26 carnitine</b>       | 1.06 (0.94-1.19)                                         | .405                                    | 1.00 (ref)                                           | 1.18 (0.85-1.66)  | 1.01 (0.72-1.43)  | 1.16 (0.83-1.63)  |
|                            | <b>Ajusted OR per 1 SD increment<sup>b</sup> (95%CI)</b> | <b>FDR-adjusted P value<sup>c</sup></b> | <b>Multivariable<sup>d</sup> adjusted OR (95%CI)</b> |                   |                   |                   |
|                            |                                                          |                                         | <i>Quartile 1</i>                                    | <i>Quartile 2</i> | <i>Quartile 3</i> | <i>Quartile 4</i> |
| <b>C2 carnitine</b>        | 1.13 (1.00-1.28)                                         | .106                                    | 1.00 (ref)                                           | 1.05 (0.74-1.49)  | 1.46 (1.03-2.07)  | 1.33 (0.95-1.88)  |
| <b>C3 carnitine</b>        | 1.03 (0.92-1.17)                                         | .753                                    | 1.00 (ref)                                           | 1.08 (0.77-1.53)  | 0.97 (0.68-1.37)  | 1.29 (0.91-1.83)  |
| <b>C3-DC-CH3 carnitine</b> | 0.99 (0.87-1.13)                                         | .916                                    | 1.00 (ref)                                           | 0.90 (0.64-1.27)  | 1.01 (0.72-1.43)  | 0.98 (0.68-1.39)  |
| <b>C4 carnitine</b>        | 0.98 (0.87-1.11)                                         | .853                                    | 1.00 (ref)                                           | 1.15 (0.82-1.61)  | 1.15 (0.82-1.62)  | 0.84 (0.59-1.21)  |
| <b>C4-OH carnitine</b>     | 1.07 (0.94-1.21)                                         | .456                                    | 1.00 (ref)                                           | 0.91 (0.65-1.28)  | 0.95 (0.67-1.36)  | 1.17 (0.82-1.67)  |
| <b>C5 carnitine</b>        | 0.99 (0.87-1.12)                                         | .913                                    | 1.00 (ref)                                           | 1.03 (0.73-1.46)  | 0.94 (0.66-1.35)  | 0.89 (0.61-1.29)  |
| <b>C5:1 carnitine</b>      | 1.07 (0.95-1.22)                                         | .400                                    | 1.00 (ref)                                           | 0.96 (0.68-1.37)  | 0.78 (0.54-1.12)  | 1.19 (0.85-1.66)  |
| <b>C5-DC carnitine</b>     | 0.97 (0.86-1.10)                                         | .818                                    | 1.00 (ref)                                           | 0.89 (0.63-1.26)  | 0.73 (0.51-1.04)  | 0.85 (0.60-1.21)  |
| <b>C6 carnitine</b>        | 1.14 (1.01-1.29)                                         | .093                                    | 1.00 (ref)                                           | 1.00 (0.70-1.42)  | 1.07 (0.76-1.51)  | 1.33 (0.96-1.86)  |
| <b>C7 carnitine</b>        | 1.09 (0.96-1.23)                                         | .281                                    | 1.00 (ref)                                           | 1.18 (0.83-1.67)  | 0.99 (0.69-1.43)  | 1.29 (0.91-1.83)  |
| <b>C8 carnitine</b>        | 1.10 (0.97-1.24)                                         | .232                                    | 1.00 (ref)                                           | 1.17 (0.83-1.64)  | 1.29 (0.90-1.84)  | 1.25 (0.88-1.77)  |
| <b>C9 carnitine</b>        | 1.01 (0.89-1.14)                                         | .916                                    | 1.00 (ref)                                           | 1.00 (0.70-1.42)  | 0.99 (0.69-1.41)  | 1.00 (0.71-1.41)  |
| <b>C10 carnitine</b>       | 1.10 (0.98-1.24)                                         | .216                                    | 1.00 (ref)                                           | 0.90 (0.65-1.26)  | 1.16 (0.82-1.63)  | 1.22 (0.87-1.70)  |
| <b>C12 carnitine</b>       | 1.13 (1.00-1.27)                                         | .126                                    | 1.00 (ref)                                           | 1.12 (0.79-1.61)  | 1.13 (0.79-1.62)  | 1.45 (1.04-2.03)  |
| <b>C12:1 carnitine</b>     | 1.15 (1.02-1.31)                                         | .093                                    | 1.00 (ref)                                           | 1.16 (0.81-1.68)  | 1.34 (0.94-1.92)  | 1.44 (1.02-2.03)  |
| <b>C14 carnitine</b>       | 1.15 (1.02-1.29)                                         | .093                                    | 1.00 (ref)                                           | 1.22 (0.85-1.74)  | 1.19 (0.82-1.75)  | 1.49 (1.06-2.09)  |

*Ruiz-Canela et al. Plasma acylcarnitines and risk of incident heart failure and atrial fibrillation: the prevención con dieta mediterránea study*

|                        |                  |      |            |                  |                  |                  |
|------------------------|------------------|------|------------|------------------|------------------|------------------|
| <b>C14:1 carnitine</b> | 1.11 (0.98-1.25) | .204 | 1.00 (ref) | 0.93 (0.66-1.31) | 1.06 (0.75-1.51) | 1.34 (0.96-1.86) |
| <b>C14:2 carnitine</b> | 1.15 (1.01-1.30) | .093 | 1.00 (ref) | 1.16 (0.81-1.67) | 1.14 (0.80-1.64) | 1.60 (1.12-2.26) |
| <b>C16 carnitine</b>   | 1.21 (1.07-1.38) | .029 | 1.00 (ref) | 1.08 (0.75-1.56) | 1.40 (0.98-2.01) | 1.68 (1.17-2.41) |
| <b>C18 carnitine</b>   | 1.25 (1.11-1.42) | .009 | 1.00 (ref) | 1.04 (0.72-1.51) | 1.35 (0.94-1.93) | 1.78 (1.25-2.54) |
| <b>C18:1 carnitine</b> | 1.16 (1.02-1.31) | .093 | 1.00 (ref) | 1.04 (0.73-1.47) | 0.79 (0.53-1.16) | 1.44 (1.02-2.03) |
| <b>C18:2 carnitine</b> | 1.21 (1.06-1.38) | .029 | 1.00 (ref) | 1.20 (0.84-1.71) | 1.34 (0.93-1.94) | 1.70 (1.18-2.44) |
| <b>C26 carnitine</b>   | 1.08 (0.95-1.22) | .337 | 1.00 (ref) | 1.21 (0.85-1.72) | 1.03 (0.72-1.49) | 1.21 (0.85-1.72) |

95%CI, 95% confidence interval; AC, acylcarnitine; OR, odds ratio.

<sup>a</sup> Cases and controls matched by sex, age, and recruitment center.

<sup>b</sup> Values were normalized and scaled to multiples of 1 SD using the rank-based inverse normal transformation.

<sup>c</sup> False discovery rate-corrected *P* value (Simes's method).

<sup>d</sup> Adjusted for intervention group (MedDiet + EVOO or MedDiet + nuts), body mass index (kg/m<sup>2</sup>), smoking (never, current, former), leisure-time physical activity (metabolic equivalent tasks in minutes/d), prevalent chronic diseases (dyslipidemia, hypertension, and diabetes), and medication use (angiotensin-converting enzyme inhibitors, diuretics, other antihypertensive treatments, statins and other lipid-lowering agents, insulin, oral hypoglycemic agents, and antiplatelet therapy).



**Figure 1 of the supplementary data.** Flow chart

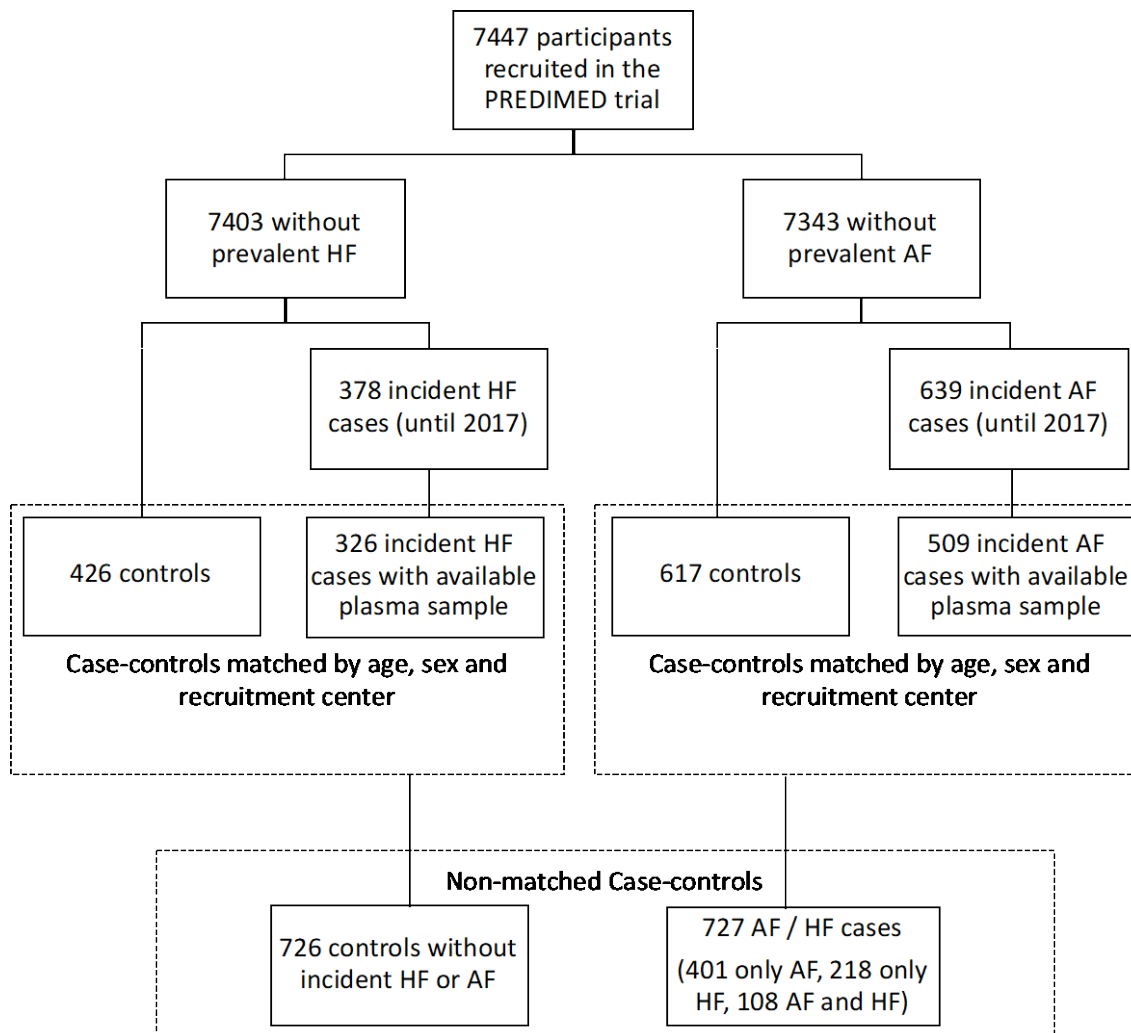

AF, atrial fibrillation; HF, heart failure.

Figure 2 of the supplementary data. Heatmap of the pair correlations for ACs vs BCAAs (N=1453)\*

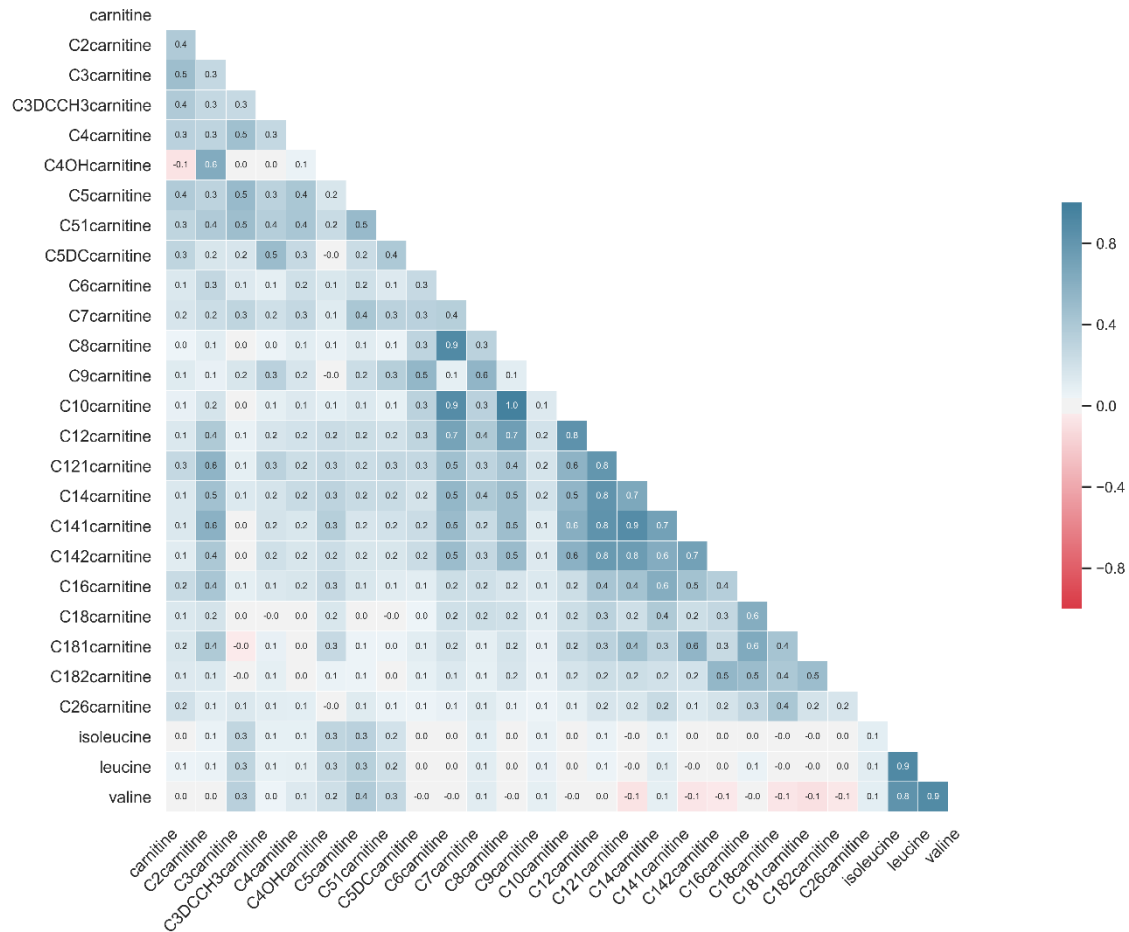

ACs, acylcarnitine; BCAAs, branched-chain amino acids.

**Figure 3 of the supplementary data.** Multivariable adjusted odds ratios and 95% confidence intervals between baseline AC levels and incident HF or AF in nested case-control (cases and controls matched by sex, age, and recruitment center) studies additionally adjusted for branched-chain amino acids.

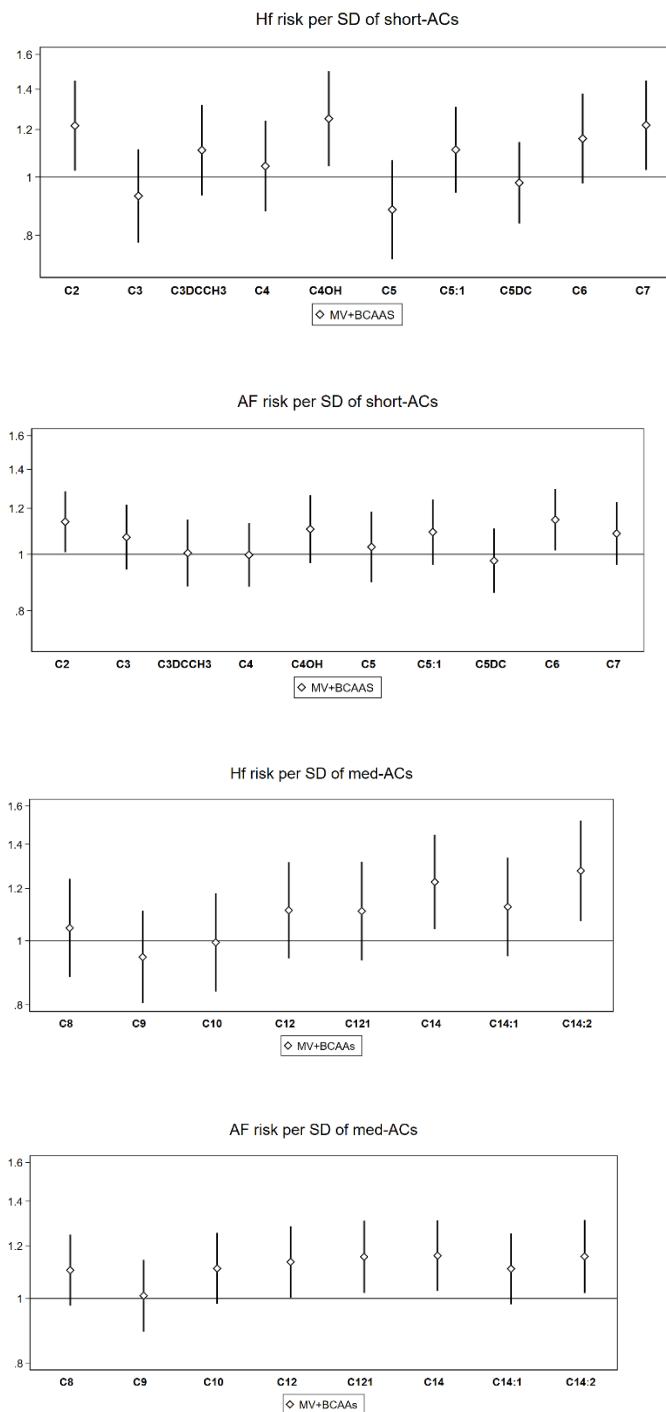

*Ruiz-Canela et al. Plasma acylcarnitines and risk of incident heart failure and atrial fibrillation: the prevención con dieta mediterránea study*

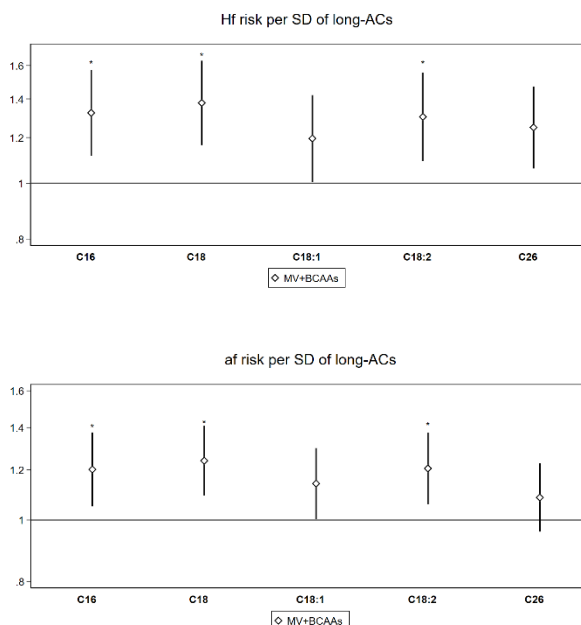

95%CI, 95% confidence interval; AC, acylcarnitine; AF, atrial fibrillation; BCAAs, branched-chain amino acids; EVOO, extra-virgin olive oil; HF, heart failure; MedDiet, Mediterranean diet; MV, multivariable model adjusted for intervention group (MedDiet + EVOO or MedDiet + nuts), body mass index (kg/m<sup>2</sup>), smoking (never, current, former), leisure-time physical activity (metabolic equivalent tasks in minutes/d), and prevalent chronic diseases (dyslipidemia, hypertension, and diabetes); RERI, relative excess of risk due to interaction.

\*FDR-corrected value < .05.

**Figure 5 of the supplementary data.** Association between baseline combined scores<sup>a</sup> of plasma acylcarnitine levels and Incident HF or AF in nested case-control studies<sup>b</sup> of the PREDIMED Trial

A)

B)

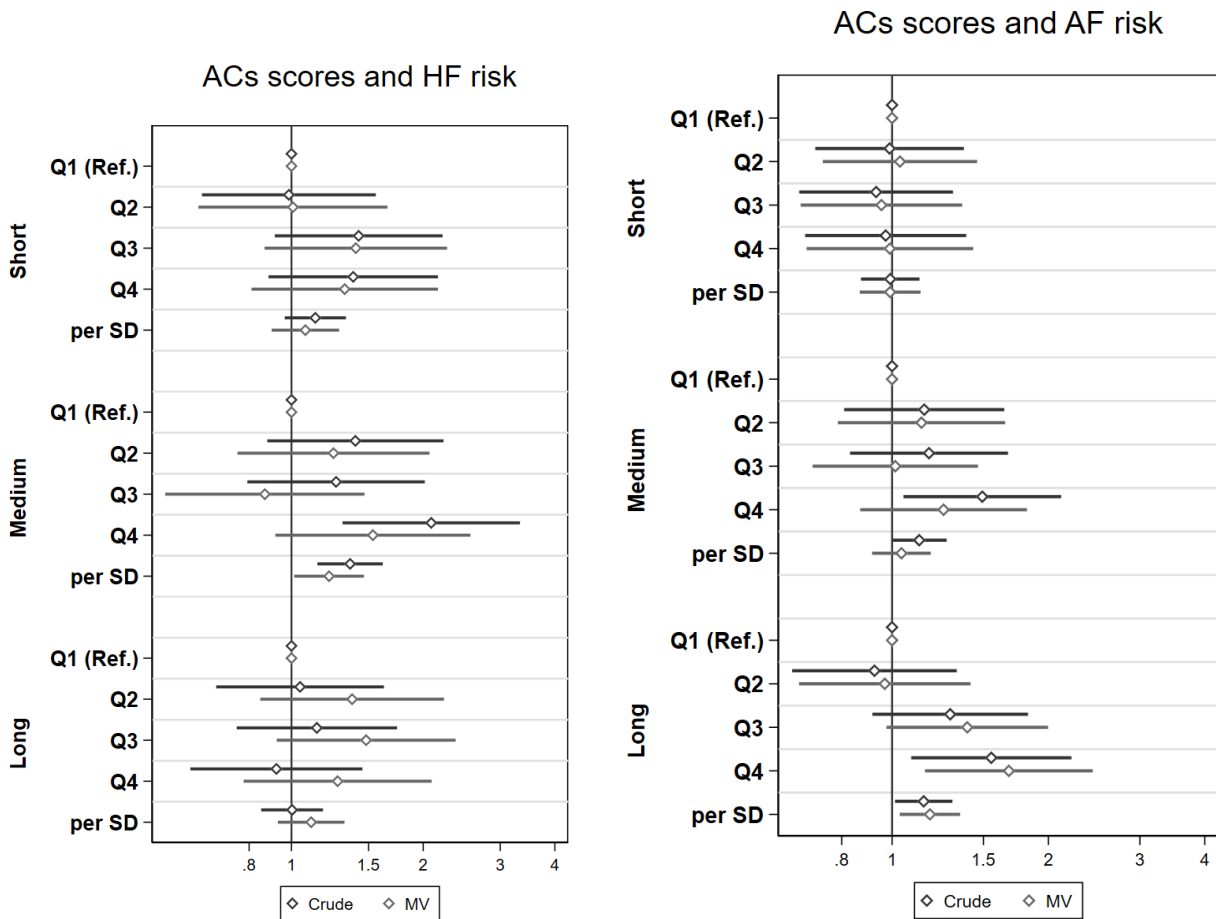

AC, acylcarnitine; AF, atrial fibrillation; HF, heart failure.

<sup>a</sup> Weighted sum of normalized values for each metabolite.

<sup>b</sup> Cases and controls matched by sex, age, and recruitment center.

Short-, medium-, and long-chain AC scores were mutually adjusted.

MV1: Multivariable model adjusted for intervention group (MedDiet + EVOO or MedDiet + nuts), body mass index (kg/m<sup>2</sup>), smoking (never, current, former), leisure-time physical activity (metabolic equivalent tasks in minutes/d), prevalent chronic diseases (dyslipidemia,

*Ruiz-Canela et al. Plasma acylcarnitines and risk of incident heart failure and atrial*

*fibrillation: the prevención con dieta mediterránea study*

hypertension, and diabetes), and medication use (angiotensin-converting enzyme inhibitor inhibitors, diuretics, other antihypertensive treatments, statins and other lipid-lowering agents, insulin, oral hypoglycemic agents, and antiplatelet therapy).
